# Supplementary material for: Duration of vegetation green-up response to snowmelt on the Tibetan Plateau
Source: Copernicus journal article supplement (doi:10.5194/egusphere-2024-2885), 2024-10-16
Supplement: Supplementary file 1 [file egusphere-2024-2885-supplement.pdf]

*Supplement of*

## **Duration of vegetation green-up response to snowmelt on the Tibetan Plateau**

Jingwen Ni<sup>1,2,3</sup>, Jin Chen<sup>4</sup>, Yao Tang<sup>1,2,3</sup>, Jingyi Xu<sup>1,2,3,5</sup>, Jiahui Xu<sup>1,2,3</sup>, Linxin Dong<sup>1,2,3</sup>, Qingyu Gu<sup>1,2,3</sup>, Bailang Yu<sup>1,2,3</sup>, Jianping Wu<sup>1,2,3</sup>, Yan Huang<sup>1,2,3</sup>

<sup>1</sup>Key Laboratory of Geographic Information Science, Ministry of Education, East China Normal University, Shanghai 200241, China

<sup>2</sup>School of Geographic Sciences, East China Normal University, Shanghai 200241, China

<sup>3</sup>Key Laboratory of Spatial-temporal Big Data Analysis and Application of Natural Resources in Megacities, Ministry of Natural Resources, Shanghai, 200241, China

<sup>4</sup>State Key Laboratory of Earth Surface Processes and Resource Ecology, Beijing Normal University, Beijing 100875, China

<sup>5</sup>Zhejiang Tiantong Forest Ecosystem National Observation and Research Station, School of Ecological and Environmental Sciences, East China Normal University, Shanghai 200241, China

*Correspondence to:* Yan Huang (yhuang@geo.ecnu.edu.cn)

---

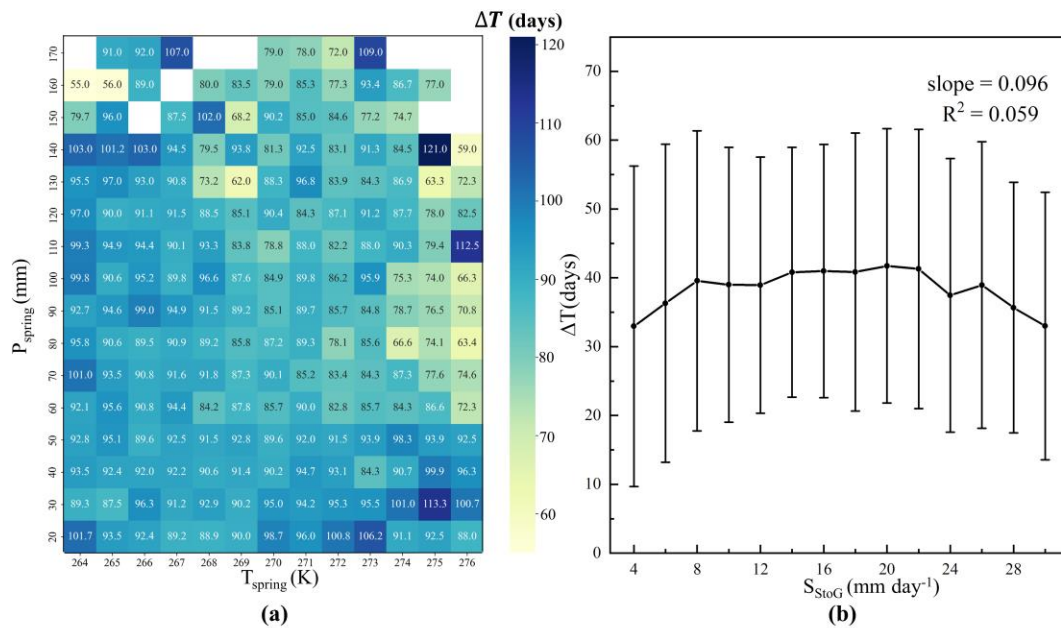

**Figure S1:** Variations in  $\Delta T$  calculated from SOMHMA across regions with differing (a) spring mean temperature ( $T_{spring}$ ), spring total rainfall ( $P_{spring}$ ), and (b) daily snowmelt from  $T_{SOM}$  to  $T_{GU}$  ( $S_{StoG}$ ). In (b), points represent the mean  $\Delta T$ , while error bars denote one standard deviation. The slope and R<sup>2</sup> value reflect the coefficient and precision of the linear regression, respectively, with a significance level of 0.01.

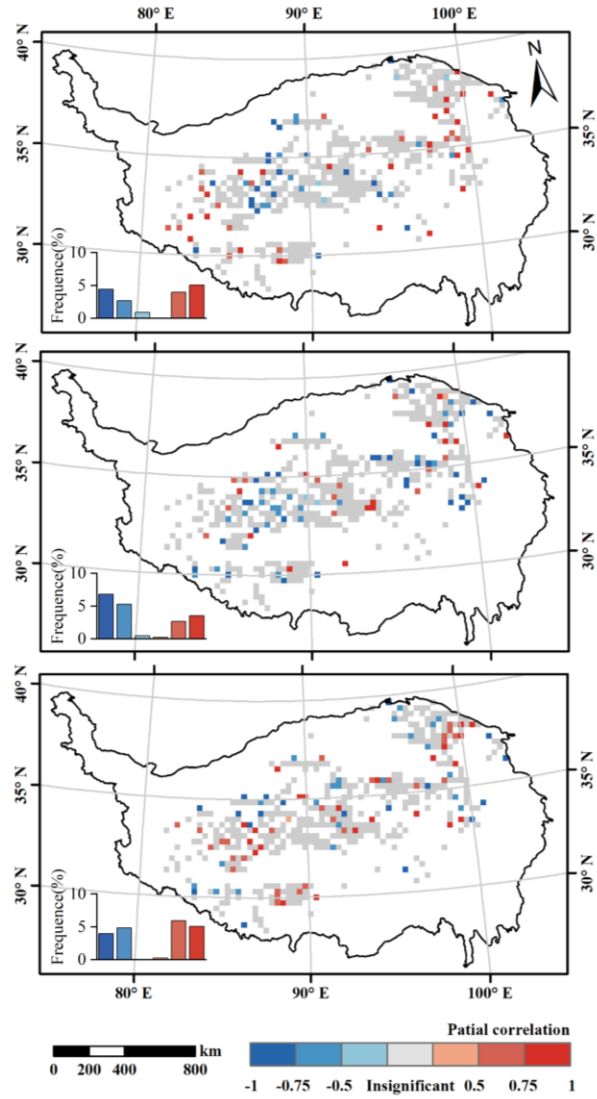

**Figure S2:** Spatial distribution of the partial correlation between  $\Delta T$  calculated from SOMHMA and (a) spring mean temperature ( $R_{\Delta T \& T_{spring}}$ ), (b) spring total rainfall ( $R_{\Delta T \& P_{spring}}$ ), and (c) daily snowmelt from  $T_{SOM}$  to  $T_{GU}$  ( $R_{\Delta T \& S_{StoG}}$ ).

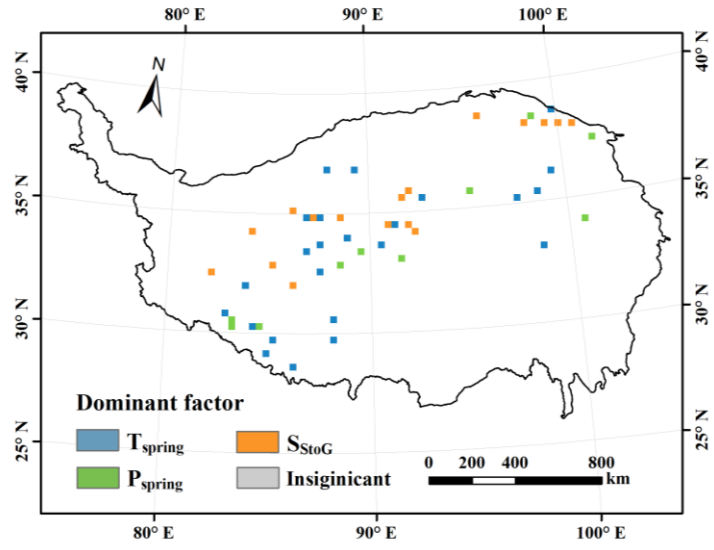

**Figure S3:** Spatial distribution of dominant factor of  $\Delta T$  calculated from SOMHMA
